# Supplementary material for: Vertical and horizontal gene transfer tradeoffs direct plasmid fitness
Source: PubMed Central journal article supplement (PMC9912019; doi:10.15252/msb.202211300), 2022-12-27
Supplement: MSB-19-e11300-s002.pdf [file MSB-19-e11300-s002.pdf]

## **APPENDIX**

Table of Contents:

Appendix Figures S1 to S8  
Appendix Tables S1 to S2

pgs. 2-9  
pgs. 10-14

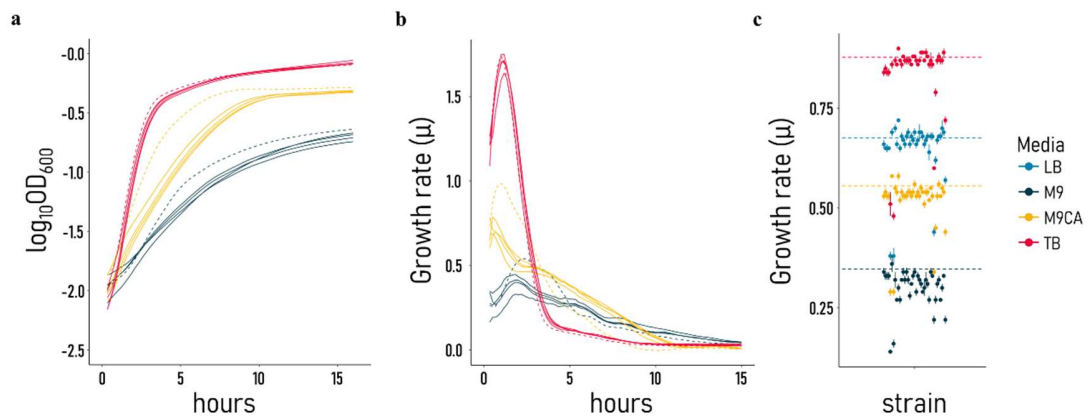

**Appendix Figure S1. Measuring plasmid growth effects.** (A) We obtained OD<sub>600</sub> growth curves in plate readers across varied media (red TB, yellow M9CA, dark blue M9) at 37°C with shaking. Plasmid-carrying MG1655 *E. coli* (solid lines) were grown alongside plasmid-free controls (dashed lines) in at least triplicate for comparison. Raw growth curves were blank-subtracted, smoothed with a weighted moving average filter, and log transformed. (B) Growth rates ( $\mu$ , hr<sup>-1</sup>) were determined across growth curves to find the maximum growth rate for each condition and replicate. (C) Average maximum growth rates were normalized by the appropriate plasmid-free control for that day and equipment to represent the plasmid growth effect ( $\omega$ ) =  $1 - (\mu_{p+}/\mu_{p-})$ . Each point represents the average of at least triplicate measurements per transconjugant strain  $\pm$  SD.

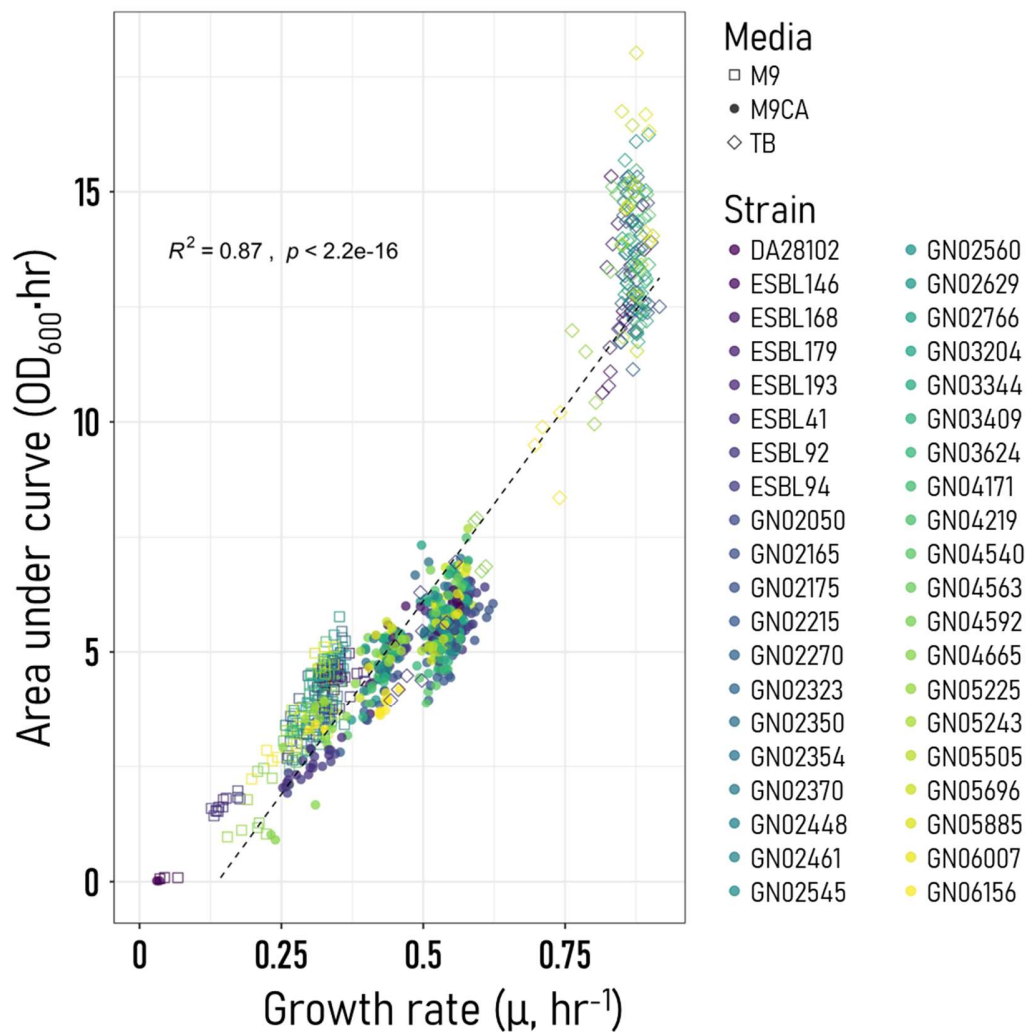

**Appendix Figure S2. Correlation between area under curve and specific growth rate.** Specific growth rates ( $\mu, \text{hr}^{-1}$ ) and areas under growth curves ( $OD_{600} \cdot \text{hr}$ ) are shown from all growth curves collected ( $n = 881$ ). Growth data include biological replicates in M9, M9CA, and TB media with and without 100 Carb ( $100 \mu\text{g}/\text{mL}$ ) and Cm ( $50 \mu\text{g}/\text{mL}$ ) antibiotics. Growth rates were calculated as in Appendix Figure 1. Areas under growth curves were calculated from blank subtracted and weighted moving average smoothed data.

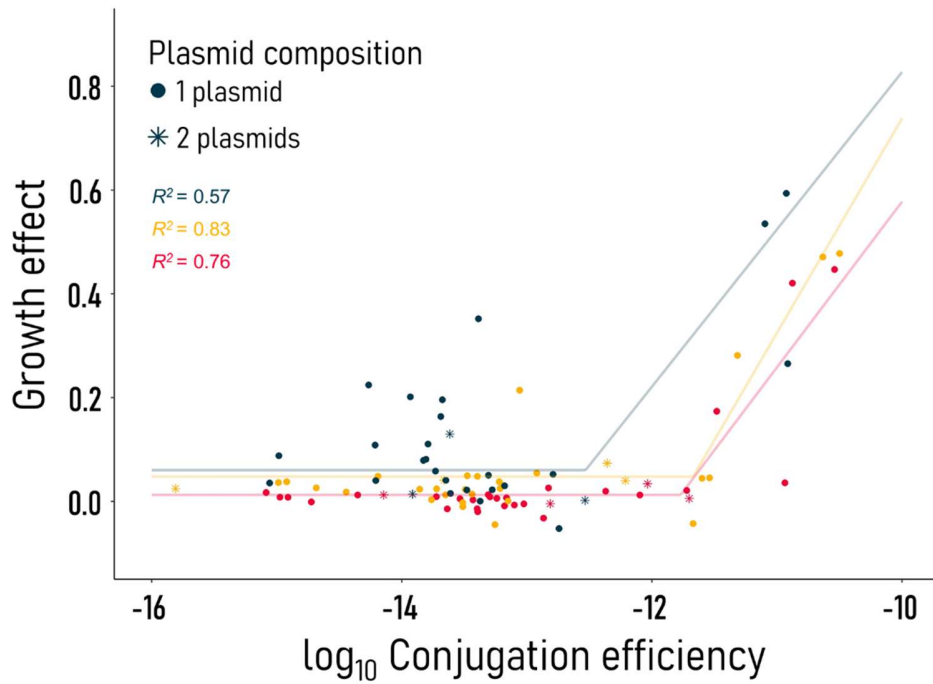

**Appendix Figure S3. Tradeoff between conjugation efficiency and plasmid growth effect across growth media.** Piecewise relationship between conjugation efficiency ( $\eta$ ,  $(\text{cells/mL})^{-1}\text{hr}^{-1}$ ) and growth effect ( $\omega$ ) of MG1655 *E. coli* transconjugants carrying diverse AMR plasmids, measured in M9 (blue), M9CA (yellow), and TB (red) growth media. Points are shaped by plasmid composition and represent the average of at least triplicate measurements.

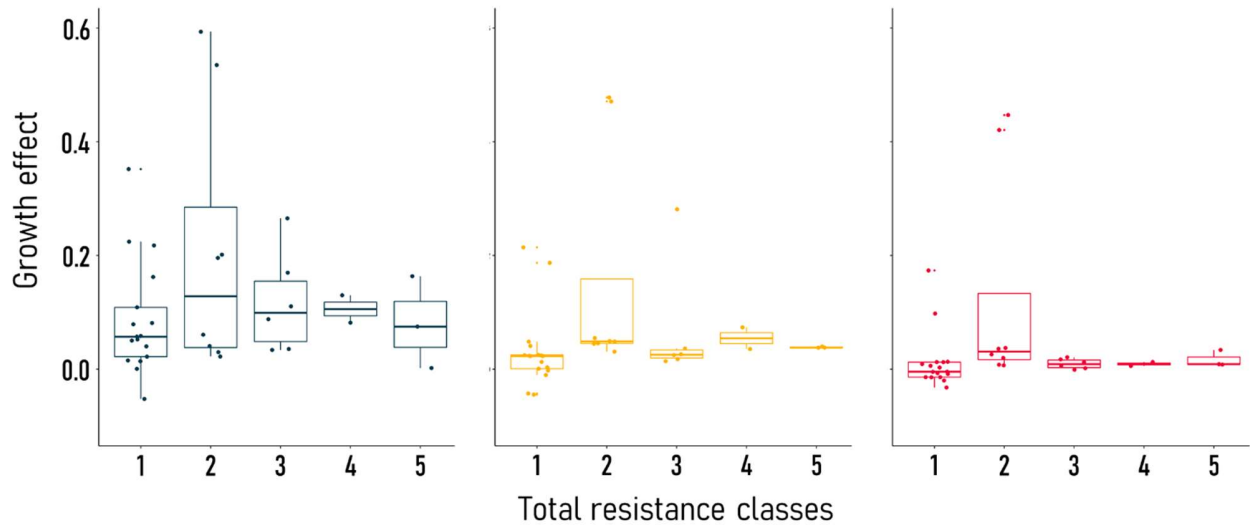

**Appendix Figure S4. Total unique classes of antibiotic resistance do not correlate with plasmid growth effect.** A one-way ANOVA revealed no significant difference in plasmid growth effect between total antibiotic resistance classes as determined by ResFinder and grouped by growth media ( $F(8, 451) = 0.366, P = 0.938$ ). M9 (blue), M9CA (yellow), and TB (red) growth media are displayed.

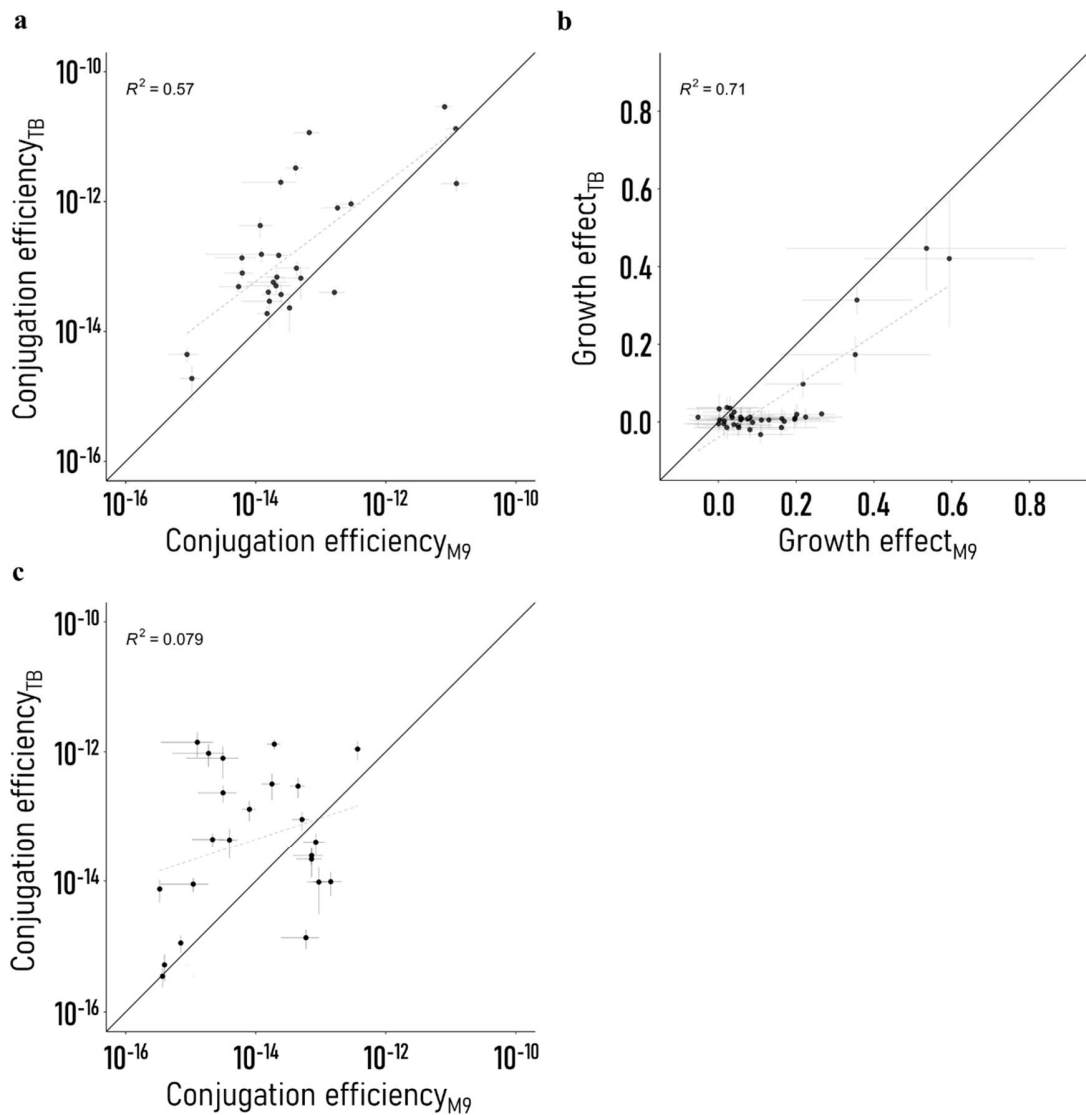

**Appendix Figure S5. Nutrient effect on conjugation efficiency and plasmid growth effect.** (A) Per strain MG1655 *E. coli* transconjugant conjugation efficiencies ((cells/mL)<sup>-1</sup>hr<sup>-1</sup>) in nutrient rich TB media compared against those in nutrient poor M9 media. (B) Per strain MG1655 *E. coli* transconjugant growth effects in TB versus M9 media. (C) Per strain *E. coli* pathogen conjugation efficiencies in TB versus M9 media. Points are averages of at least triplicate measurements +/- SD. Solid lines indicate 1:1 parity between conditions.

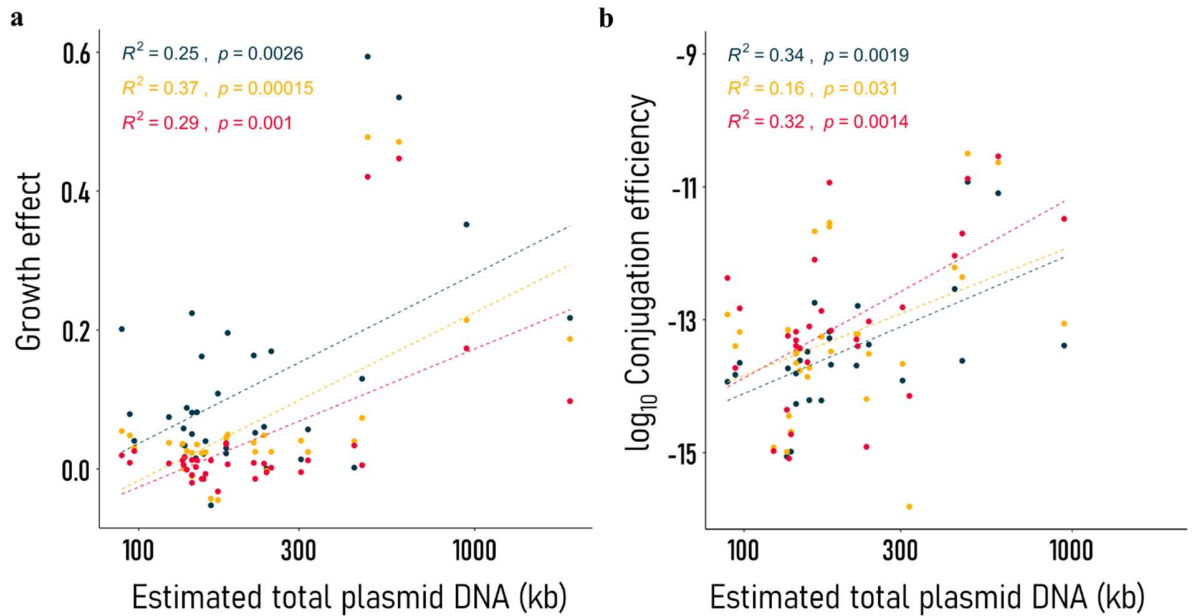

**Appendix Figure S6. Correlations with estimated total plasmid DNA.** Total plasmid DNA was estimated from sequence length and average sequence coverage relative to the bacterial chromosome. Cultures for sequencing were grown in LB media. (A) The relationship between estimated total plasmid DNA and plasmid growth effect. Average growth effects ( $n = 3-5$  biological replicates) are shown for M9 (blue), M9CA (yellow), and TB (red) media. (B) The relationship between estimated total plasmid DNA and conjugation efficiency. Average conjugation efficiencies ( $n = 3-6$  technical replicates, 1-2 biological replicates) are shown for each media condition.

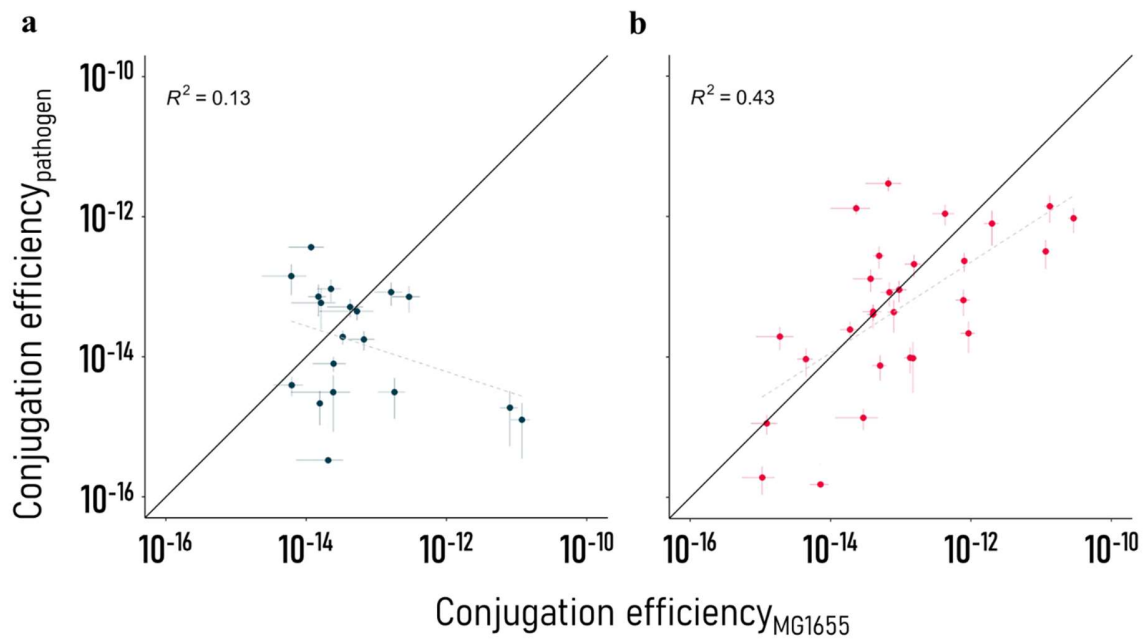

**Appendix Figure S7. Host effects on vertical and horizontal gene transfer.** Conjugation efficiency  $((\text{cells/mL})^{-1}\text{hr}^{-1})$  comparison between the original pathogenic and MG1655 *E. coli* in (A) nutrient poor M9 and (B) rich TB media. All points represent the average of at least triplicate measurements  $\pm$  SD. Solid lines indicate 1:1 parity between conditions. Dashed lines are trendlines between pathogen and MG1655 conjugation efficiencies.



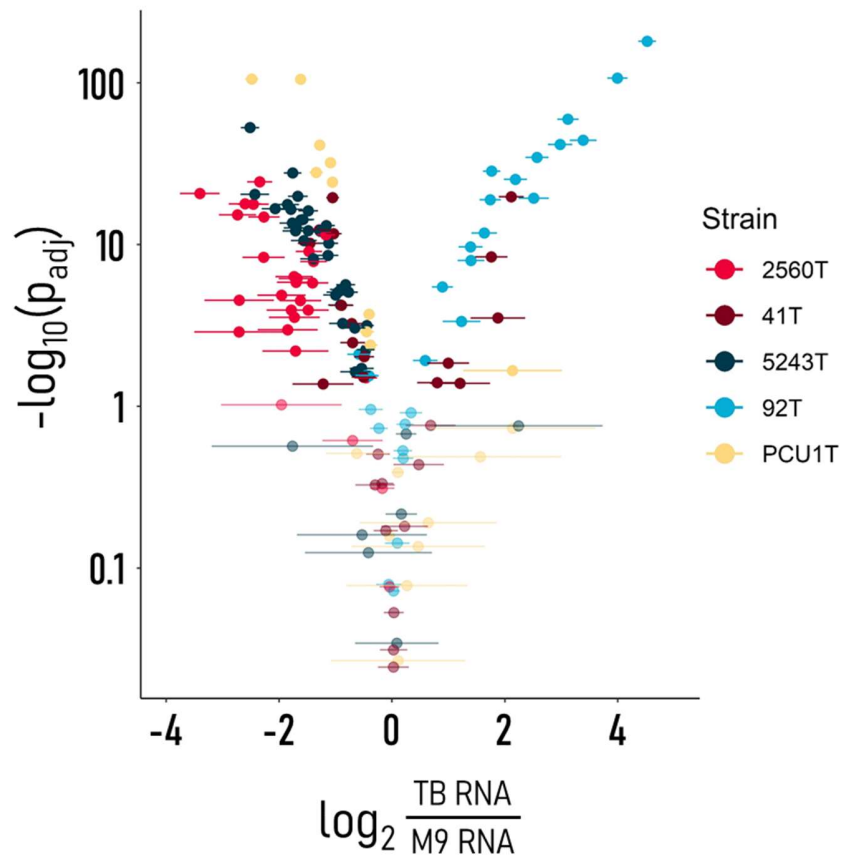

**Appendix Figure S8. Expression of genes associated with HGT by strain.** Volcano plot from Figure 5 colored by strain.

| Strain  | Sequence Type (ST) | fimH | Plasmid Size (kb) | MOB Relaxase | Incompatibility (Inc) Group | Antibiotic Resistance | Transconj. Presence | Est. Copy # | Reference       |
|---------|--------------------|------|-------------------|--------------|-----------------------------|-----------------------|---------------------|-------------|-----------------|
| DA28102 | 10                 | H27  | -                 | -            | -                           | P                     | -                   | -           | Gullberg et al. |
| fAYC002 | -                  | -    | -                 | -            | -                           | A                     | -                   | -           | Chen et al.     |
| pCU1    | -                  | -    | -                 | -            | IncN                        | A, B                  | +                   | -           | Sysoeva et al.  |
| ESBL41  | 131                | H30  | 121               | MOBF         | IncFIB/IncFIA/IncFII        | P                     | -                   | -           | Bethke et al.   |
|         |                    |      | 120               | MOBF         | IncN/IncFII                 | B, P                  | +                   | 4           |                 |
| ESBL92  | 3057               | H445 | 82                | MOBP         | IncFII/IncI1                | B                     | +                   | 2           | Bethke et al.   |
| ESBL94  | 131                | H30  | 121               | MOBF         | IncFIB/IncFIA/IncFII        | P                     | -                   | -           | Bethke et al.   |
|         |                    |      | 119               | MOBF         | IncN/IncFII                 | B, P                  | +                   | 5           |                 |
| ESBL146 | 131                | H30  | 100               | MOBF         | IncFIB/IncFIA/IncFII        | A, B, M, S, T         | +                   | 3           | Bethke et al.   |
|         |                    |      | 97                | -            | IncY                        | -                     | -                   | -           |                 |
|         |                    |      | 69                | MOBF         | IncFII                      | -                     | -                   | -           |                 |
|         |                    |      | 46                | MOBF         | IncN                        | -                     | +                   | 3           |                 |
| ESBL168 | 405                | H27  | 131               | MOBF         | IncFIB/IncFII/Col156        | P                     | -                   | -           | Bethke et al.   |
|         |                    |      | 109               | -            | IncFIB                      | -                     | -                   | -           |                 |
|         |                    |      | 97                | MOBP         | IncB/O/K/Z                  | B, S                  | +                   | 1           |                 |
|         |                    |      | 92                | MOBF         | IncQ1/IncFII                | S, T                  | -                   | -           |                 |
|         |                    |      | 60                | -            | IncI2                       | -                     | -                   | -           |                 |
|         |                    |      | 57                | MOBF         | IncN2                       | -                     | -                   | -           |                 |
| ESBL179 | 131                | H30  | 122               | MOBF         | IncFIA/IncFII               | A, S, T               | -                   | -           | Bethke et al.   |
|         |                    |      | 91                | MOBP         | IncI1                       | A, B                  | +                   | 2           |                 |
|         |                    |      | 72                | MOBF         | IncFII                      | B                     | -                   | -           |                 |
| ESBL193 | 131                | H30  | 122               | MOBF         | IncFIA/IncFII               | A, S, T               | -                   | -           | Bethke et al.   |
|         |                    |      | 91                | MOBP         | IncI1                       | A, B                  | +                   | 2           |                 |
| GN02050 | 144                | H54  | 121               | MOBF         | IncFIB/IncFII/Col156_1      | -                     | -                   | -           | This study      |
|         |                    |      | 68                | MOBF         | IncFIC(FII) <sup>a</sup>    | B                     | +                   | 2           |                 |
|         |                    |      | 16                | MOBF         | IncFIC(FII) <sup>a</sup>    | -                     | -                   | -           |                 |
|         |                    |      | 12                | MOBP         | ColRNAI_1 <sup>a</sup>      | -                     | -                   | -           |                 |
|         |                    |      | 11                | MOBQ         | Col156_1                    | -                     | -                   | -           |                 |
|         |                    |      | 7                 | MOBQ         | Col156_1                    | -                     | -                   | -           |                 |
|         |                    |      | 6                 | cat          | ColRNAI_1 <sup>a</sup>      | -                     | -                   | -           |                 |
| GN02165 | 95                 | H107 | 176               | MOBF         | IncFIB/IncFIC(FII)/IncFIA   | -                     | -                   | -           | This study      |
|         |                    |      | 72                | MOBF         | IncFIC(FII) <sup>a</sup>    | B                     | +                   | 2           |                 |
|         |                    |      | 44                | MOBF         | IncN                        | -                     | -                   | -           |                 |
|         |                    |      | 35                | MOBQ         | IncX5_2 <sup>a</sup>        | -                     | -                   | -           |                 |
|         |                    |      | 21                | -            | IncN                        | -                     | -                   | -           |                 |
| GN02175 | 144                | H54  | 145               | MOBF         | IncFIB/IncFII/Col156        | P                     | -                   | -           | Bethke et al.   |
|         |                    |      | 86                | MOBP         | IncB/O/K/Z                  | B                     | +                   | 2           |                 |
|         |                    |      | 34                | MOBQ         | IncX1                       | -                     | -                   | -           |                 |

|         |     |      |     |           |                                          |               |   |    |               |
|---------|-----|------|-----|-----------|------------------------------------------|---------------|---|----|---------------|
|         |     |      | 29  | -         | IncFII                                   | -             | - | -  |               |
|         |     |      | 10  | -         | -                                        | B             | - | -  |               |
| GN02270 | 69  | H27  | 165 | MOBF      | IncFIB/IncFII                            | B             | + | 1  | This study    |
|         |     |      | 7   | MOBP      | ColRNAI_1 <sup>a</sup>                   | -             | + | 22 |               |
|         |     |      | 5   | MOBQ      | Col156_1                                 | -             | - | -  |               |
| GN02323 | 73  | H30  | 114 | MOBF      | IncFIB/IncFII/Col156_1                   | P             | - | -  | This study    |
|         |     |      | 74  | MOBF      | IncFIC(FII) <sup>a</sup>                 | B             | + | 2  |               |
|         |     |      | 6   | -         | ColRNAI_1 <sup>a</sup>                   | -             | + | 26 |               |
| GN02350 | 12  | H27  | 118 | MOBF      | IncFIB/IncFII/Col156_1                   | B, S          | + | 2  | This study    |
| GN02448 | 131 | H22  | 124 | MOBF      | IncFIB/IncFIA/IncFII                     | B, P, S       | + | 2  | Bethke et al. |
|         |     |      | 98  | -         | p0111                                    | -             | - | -  |               |
|         |     |      | 54  | MOBF      | IncN <sup>a</sup>                        | -             | - | -  |               |
| GN02461 | 68  | H382 | 149 | MOBF      | IncFIB/IncFII/IncQ1                      | A, B, S, T    | + | 1  | This study    |
|         |     |      | 78  |           | IncFII(pECLA) <sup>a</sup> /IncI1_LAlpha | B             | - | -  |               |
|         |     |      | 16  | MOBQ      | Col156_1                                 | -             | - | -  |               |
|         |     |      | 7   | MOBP      | ColRNAI_1 <sup>a</sup>                   | -             | - | -  |               |
| GN02545 | 131 | H22  | 79  | MOBF      | IncFII                                   | B             | + | 2  | Bethke et al. |
| GN02560 | 131 | H30  | 136 | MOBF      | IncFIB/IncFIA/IncFII/Col156_1            | B             | - | -  |               |
|         |     |      | 80  | MOBF      | IncFII                                   | B             | + | 3  |               |
|         |     |      | 14  | MOBP,MOBQ | Col156_1                                 | -             | - | -  |               |
|         |     |      | 7   | MOBQ      | Col156_1                                 | -             | - | -  |               |
|         |     |      | 6   | MOBQ      | Col156_1                                 | -             | - | -  |               |
|         |     |      | 5   | -         | Col(MG828)_1/ColpVC_1                    | -             | - | -  |               |
| GN02629 | 131 | H30  | 110 | MOBF      | IncFIA/IncFII                            | A, B, M, S, T | + | 2  | Bethke et al. |
|         |     |      | 109 | -         | IncFIB                                   | -             | - | -  |               |
| GN02766 | 73  | H9   | 137 | MOBF      | IncFIB/IncFII/Col156                     | A, B, S       | + | 1  | Bethke et al. |
| GN03204 | 131 | H41  | 123 | MOBF      | IncFIB/IncFII/Col156_1                   | A, B, M, S, T | + | 1  | This study    |
| GN03344 | 131 | H30  | 131 | MOBF      | IncFIB/IncFIA/IncFII/Col156_1            | B             | - | -  |               |
|         |     |      | 72  | MOBF      | IncFIC(FII) <sup>a</sup>                 | B             | + | 2  |               |
|         |     |      | 19  | MOBQ      | Col156_1                                 | -             | - | -  |               |
|         |     |      | 13  | MOBP      | ColRNAI_1 <sup>a</sup>                   | -             | - | -  |               |
|         |     |      | 6   | MOBP      | Col440II_1 <sup>a</sup> /ColRNAI_1       | -             | - | -  |               |
| GN03409 | 95  | H18  | 77  | MOBF      | IncFII                                   | B             | + | 2  | Bethke et al. |
|         |     |      | 76  | MOBF      | IncFIB/IncFII                            | -             | - | -  |               |
| GN03624 | 58  | H27  | 191 | MOBF      | IncFIB/IncFIC(FII)                       | -             | - | -  | Bethke et al. |
|         |     |      | 119 | -         | IncFII                                   | A, S, T       | + | 2  |               |
|         |     |      | 112 | MOBP      | IncI1                                    | A, B, S       | + | 2  |               |
| GN04171 | 131 | H30  | 74  | MOBF      | IncFIC(FII) <sup>a</sup>                 | B             | + | 3  | This study    |
|         |     |      | 68  |           | IncFIB/IncFIA/IncFII                     | B             | - | -  |               |
|         |     |      | 43  | MOBF      | IncN_1                                   | -             | - | -  |               |
|         |     |      | 6   | -         | ColRNAI_1 <sup>a</sup>                   | -             | - | -  |               |
| GN04219 | 69  | H27  | 139 | MOBF      | IncFIB/IncQ1/IncFII/Col156               | B, S, T       | + | 1  | This study    |

|         |     |     |     |      |                            |            |   |    |               |
|---------|-----|-----|-----|------|----------------------------|------------|---|----|---------------|
| GN04540 | 963 | H26 | 94  | MOBP | IncFII(pECLA)/IncI1        | B          | - | -  | Bethke et al. |
|         |     |     | 89  | MOBF | IncFII                     | A, B       | + | 1  |               |
| GN04563 | 131 | H30 | 74  | MOBF | IncFIC(FII)                | B          | + | 2  | Bethke et al. |
|         |     |     | 44  | -    | IncFIB/IncFIA              | T          | - | -  |               |
| GN04592 | 69  | H27 | 135 | MOBF | IncFIB/IncQ1/IncFII/Col156 | B, S, T    | + | 1  | This study    |
| GN05225 | 69  | H27 | 113 | MOBF | IncFIB/IncFIA/IncFII       | B          | + | 17 | This study    |
| GN05243 | 131 | H30 | 127 | -    | IncFIA/IncFII              | A, M, S, T | - | -  | This study    |
|         |     |     | 94  | MOBP | IncB/O/K/Z                 | B          | + | 1  |               |
|         |     |     | 62  | MOBF | IncN_1                     | T          | - | -  |               |
|         |     |     | 38  | MOBP | IncX4_2                    | -          | - | -  |               |
|         |     |     | 22  | -    | -                          | T          | - | -  |               |
| GN05505 | 69  | H27 | 125 | MOBF | IncFIB/IncFII/Col156       | -          | - | -  | This study    |
|         |     |     | 72  | MOBF | IncFIC(FII) <sup>a</sup>   | B          | + | 2  |               |
|         |     |     | 5   | MOBQ | Col156_1                   | -          | - | -  |               |
| GN05696 | 95  | H27 | 92  | MOBF | IncN/IncFII                | B, S       | + | 2  | Bethke et al. |
|         |     |     | 15  | -    | Col                        | -          | - | -  |               |
| GN05885 | 131 | -   | 120 | MOBP | IncB/O/K/Z                 | B, T, S    | + | -  | Bethke et al. |
|         |     |     | 79  | -    | IncFII                     | B, P       | - | -  |               |
| GN06007 | 69  | H27 | 93  | MOBF | IncFIB/IncFII              | A, B, S, T | - | -  | Bethke et al. |
|         |     |     | 78  | MOBF | IncFII(pCoo)               | B          | + | 2  |               |
|         |     |     | 32  | MOBF | IncN                       | -          | - | -  |               |
| GN06156 | 69  | H47 | 90  | MOBP | IncI1_1_Alpha              | -          | - | -  | This study    |
|         |     |     | 63  | MOBF | IncFII(pCoo)_1             | B          | + | 15 |               |

A, aminoglycoside; B, beta-lactam; M, macrolide; P, phenicol; S, sulfonamide; T, tetracycline  
<90% sequence identity<sup>a</sup>

**Appendix Table S1. Strains and plasmids used in this study.** Pathogen donor strains were sequenced and are listed here with plasmid-free recipient strains DA28102 and fAYC002. The transconjugant DA28102 strains carrying AMR plasmids are indicated by a #T nomenclature throughout the text. Antibiotics abbreviations are as follows: A, aminoglycoside; B, beta-lactam; M, macrolide; P, phenicol; S, sulfonamide; T, tetracycline. < 90% sequence identity<sup>a</sup>.

| Strain   | M9    |          |          | M9CA  |          |          | TB    |          |          |
|----------|-------|----------|----------|-------|----------|----------|-------|----------|----------|
|          | $\mu$ | $\omega$ | $\eta$   | $\mu$ | $\omega$ | $\eta$   | $\mu$ | $\omega$ | $\eta$   |
| DA28102  | 0.342 | NA       | NA       | 0.554 | NA       | NA       | 0.874 | NA       | NA       |
| ESBL41T  | 0.139 | 0.594    | 1.19E-11 | 0.289 | 0.478    | 3.17E-11 | 0.506 | 0.421    | 1.33E-11 |
| ESBL92T  | 0.360 | -0.052   | 1.81E-13 | 0.577 | -0.043   | 2.14E-12 | 0.863 | 0.012    | 8.02E-13 |
| ESBL94T  | 0.159 | 0.535    | 8.03E-12 | 0.293 | 0.471    | 2.33E-11 | 0.483 | 0.447    | 2.89E-11 |
| ESBL146T | 0.341 | 0.002    | 2.92E-13 | 0.532 | 0.040    | 6.14E-13 | 0.845 | 0.034    | 9.23E-13 |
| ESBL168T | 0.328 | 0.041    | 2.25E-14 | 0.537 | 0.031    | 6.56E-14 | 0.852 | 0.026    | 1.49E-13 |
| ESBL179T | 0.334 | 0.022    | 5.29E-14 | 0.529 | 0.045    | 2.52E-12 | 0.842 | 0.037    | -        |
| ESBL193T | 0.332 | 0.030    | 6.64E-14 | 0.529 | 0.045    | 2.89E-12 | 0.843 | 0.036    | 1.16E-11 |
| GN02050T | 0.322 | 0.058    | 1.86E-14 | 0.553 | 0.001    | 7.07E-14 | 0.869 | 0.006    | 5.75E-14 |
| GN02165T | 0.265 | 0.224    | 5.43E-15 | 0.541 | 0.023    | 3.22E-14 | 0.863 | 0.013    | 4.91E-14 |
| GN02175T | 0.305 | 0.108    | 6.12E-15 | 0.579 | -0.045   | 5.56E-14 | 0.902 | -0.032   | 1.36E-13 |
| GN02215T | 0.275 | 0.197    | -        | 0.520 | 0.060    | -        | 0.865 | 0.010    | -        |
| GN02270T | 0.322 | 0.057    | -        | 0.540 | 0.025    | 1.55E-16 | 0.863 | 0.012    | 7.17E-15 |
| GN02323T | 0.337 | 0.014    | 1.22E-14 | 0.531 | 0.041    | 2.18E-14 | 0.878 | -0.005   | 1.54E-13 |
| GN02350T | 0.321 | 0.061    | -        | 0.527 | 0.048    | 6.44E-15 | 0.867 | 0.008    | 1.23E-15 |
| GN02354T | 0.341 | 0.003    | -        | 0.534 | 0.036    | -        | 0.870 | 0.005    | -        |
| GN02370T | 0.322 | 0.058    | -        | 0.541 | 0.023    | -        | 0.869 | 0.006    | 7.79E-13 |
| GN02448T | 0.284 | 0.170    | -        | 0.540 | 0.025    | -        | 0.873 | 0.002    | -        |
| GN02461T | 0.314 | 0.082    | -        | 0.534 | 0.035    | -        | 0.863 | 0.013    | -        |
| GN02545T | 0.328 | 0.040    | 6.19E-15 | 0.540 | 0.024    | 1.90E-14 | 0.880 | -0.007   | 7.95E-14 |
| GN02560T | 0.342 | 0.000    | 4.23E-14 | 0.555 | -0.002   | 3.07E-14 | 0.878 | -0.005   | 9.46E-14 |
| GN02629T | 0.286 | 0.163    | 2.05E-14 | 0.533 | 0.038    | 6.01E-14 | 0.867 | 0.009    | 5.07E-14 |
| GN02766T | 0.330 | 0.034    | -        | 0.544 | 0.018    | 3.59E-15 | 0.859 | 0.017    | 8.21E-16 |
| GN03204T | 0.316 | 0.075    | -        | 0.533 | 0.038    | 1.20E-15 | 0.867 | 0.008    | 1.06E-15 |
| GN03344T | 0.314 | 0.081    | 1.56E-14 | 0.547 | 0.013    | 2.24E-14 | 0.892 | -0.020   | 4.05E-14 |
| GN03409T | 0.287 | 0.162    | -        | 0.541 | 0.023    | -        | 0.887 | -0.014   | -        |
| GN03624T | 0.298 | 0.130    | 2.42E-14 | 0.513 | 0.073    | 4.39E-13 | 0.869 | 0.006    | 1.99E-12 |
| GN04171T | 0.324 | 0.052    | 1.62E-13 | 0.540 | 0.025    | 6.12E-14 | 0.887 | -0.014   | 4.01E-14 |
| GN04219T | 0.312 | 0.088    | 1.04E-15 | 0.539 | 0.026    | 2.07E-15 | 0.875 | -0.001   | 1.89E-15 |
| GN04540T | 0.273 | 0.201    | 1.17E-14 | 0.524 | 0.055    | 1.20E-13 | 0.857 | 0.020    | 4.27E-13 |
| GN04563T | 0.337 | 0.015    | 2.45E-14 | 0.552 | 0.003    | 1.73E-14 | 0.872 | 0.003    | 3.71E-14 |
| GN04592T | 0.330 | 0.035    | 8.76E-16 | 0.534 | 0.036    | 1.03E-15 | 0.863 | 0.012    | 4.44E-15 |
| GN04665T | 0.220 | 0.356    | -        | 0.343 | 0.380    | -        | 0.600 | 0.314    | -        |
| GN05225T | 0.268 | 0.218    | -        | 0.450 | 0.187    | -        | 0.789 | 0.098    | -        |
| GN05243T | 0.315 | 0.079    | 1.49E-14 | 0.527 | 0.048    | 4.02E-14 | 0.866 | 0.009    | 1.89E-14 |
| GN05505T | 0.325 | 0.050    | 4.93E-14 | 0.559 | -0.010   | 3.08E-14 | 0.882 | -0.009   | 6.62E-14 |
| GN05696T | 0.275 | 0.196    | 2.11E-14 | 0.526 | 0.049    | 3.34E-14 | 0.868 | 0.007    | 6.88E-14 |
| GN05885T | 0.304 | 0.111    | 1.62E-14 | 0.546 | 0.014    | 3.65E-14 | 0.870 | 0.005    | 2.92E-14 |
| GN06007T | 0.334 | 0.022    | 3.31E-14 | 0.541 | 0.023    | 1.39E-14 | 0.887 | -0.014   | 2.31E-14 |
| GN06156T | 0.222 | 0.352    | 4.10E-14 | 0.435 | 0.214    | 8.76E-14 | 0.722 | 0.174    | 3.30E-12 |
| pCU1T    | 0.251 | 0.265    | 1.22E-11 | 0.398 | 0.281    | 4.83E-12 | 0.856 | 0.021    | 1.90E-12 |

**Appendix Table S2. Strain specific growth rates ( $\mu$ ,  $\text{hr}^{-1}$ ), plasmid growth effects ( $\omega$ ), and conjugation efficiencies ( $\eta$ ,  $(\text{cells/mL})^{-1}\text{hr}^{-1}$ ).** DA28102 transconjugant strains indicated by #T, with plasmid growth effects relative to plasmid-free DA28102 in each media. Growth data are averages of 3-5 biological replicates. Conjugation efficiency data are averages of 3-6 technical replicates and 1-2 biological replicates.
